# Supplementary material for: Synthesis, structure and magnetic properties of two new spin-chain compounds Ca2Ni(HSeO3)2(SeO3)2 and Na2Cu(SeO3)2·2H2O
Source: Royal Society of Chemistry journal article supplement (doi:10.1039/d1dt03058b), 2021-01-01
Supplement: d1dt03058b3.pdf [file d1dt03058b3.pdf]

## Supporting Information

### Synthesis, structure and magnetic properties of two new spin-chain compounds $\text{Ca}_2\text{Ni}(\text{HSeO}_3)_2(\text{SeO}_3)_2$ and $\text{Na}_2\text{Cu}(\text{SeO}_3)_2 \cdot 2\text{H}_2\text{O}$

Xing Huang, Zhiying Zhao, Yanqi Wang, Mengsi Zhang, Zhangzhen He\*

State Key Laboratory of Structural Chemistry, Fujian Institute of Research on the Structure of Matter, Chinese Academy of Sciences, Fuzhou 350002, China

\*E-mail: [hc21988@hotmail.com](mailto:hc21988@hotmail.com); [hezz@fjirsm.ac.cn](mailto:hezz@fjirsm.ac.cn).

**Fig. S1.** The powder XRD patterns of  $\text{Ca}_2\text{Ni}(\text{HSeO}_3)_2(\text{SeO}_3)_2$  and  $\text{Na}_2\text{Cu}(\text{SeO}_3)_2 \cdot 2\text{H}_2\text{O}$ .

**Fig. S2.** The oxygen-coordination environments for Ca atom in  $\text{Ca}_2\text{Ni}(\text{HSeO}_3)_2(\text{SeO}_3)_2$  and Na atom in  $\text{Na}_2\text{Cu}(\text{SeO}_3)_2 \cdot 2\text{H}_2\text{O}$ .

**Fig. S3.** The FC-ZFC magnetic susceptibilities for  $\text{Ca}_2\text{Ni}(\text{HSeO}_3)_2(\text{SeO}_3)_2$  and  $\text{Na}_2\text{Cu}(\text{SeO}_3)_2 \cdot 2\text{H}_2\text{O}$  measured in an applied field of 0.1 T.

**Fig. S4.** The magnetization curves at low magnetic field for  $\text{Ca}_2\text{Ni}(\text{HSeO}_3)_2(\text{SeO}_3)_2$  and  $\text{Na}_2\text{Cu}(\text{SeO}_3)_2 \cdot 2\text{H}_2\text{O}$ .

**Table S1.** Fractional atomic coordinates and equivalent isotropic displacement parameters for  $\text{Ca}_2\text{Ni}(\text{HSeO}_3)_2(\text{SeO}_3)_2$ .

**Table S2.** Selected bond lengths and bond angles of  $\text{Ca}_2\text{Ni}(\text{HSeO}_3)_2(\text{SeO}_3)_2$ .

**Table S3.** Fractional atomic coordinates and equivalent isotropic displacement parameters for  $\text{Na}_2\text{Cu}(\text{SeO}_3)_2 \cdot 2\text{H}_2\text{O}$ .

**Table S4.** Selected bond lengths and bond angles of  $\text{Na}_2\text{Cu}(\text{SeO}_3)_2 \cdot 2\text{H}_2\text{O}$ .

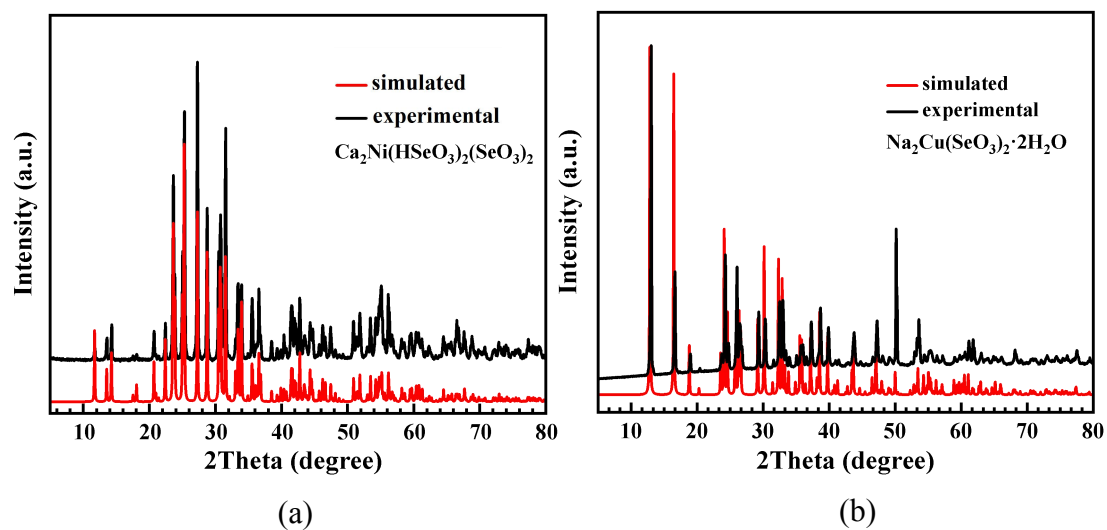

**Fig. S1.** The powder XRD patterns of (a)  $\text{Ca}_2\text{Ni}(\text{HSeO}_3)_2(\text{SeO}_3)_2$  and (b)  $\text{Na}_2\text{Cu}(\text{SeO}_3)_2 \cdot 2\text{H}_2\text{O}$ .

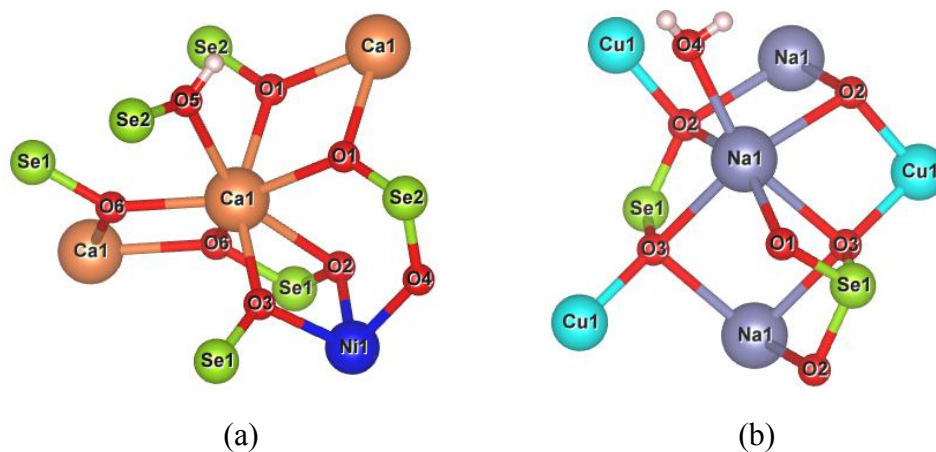

**Fig. S2.** The oxygen-coordination environments for (a) Ca atom in  $\text{Ca}_2\text{Ni}(\text{HSeO}_3)_2(\text{SeO}_3)_2$  and (b) Na atom in  $\text{Na}_2\text{Cu}(\text{SeO}_3)_2 \cdot 2\text{H}_2\text{O}$ .

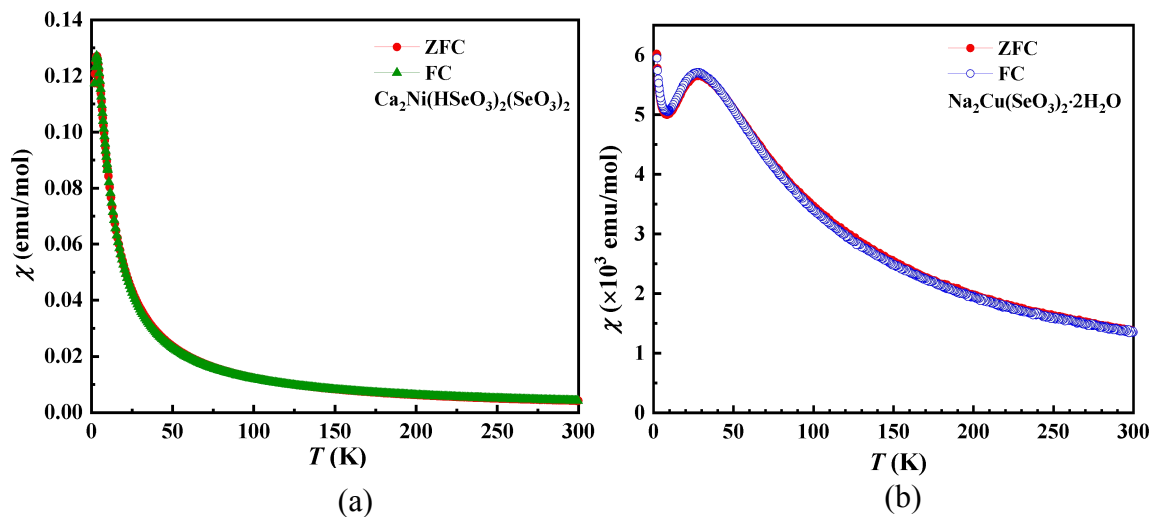

**Fig. S3.** The FC-ZFC magnetic susceptibilities for (a)  $\text{Ca}_2\text{Ni}(\text{HSeO}_3)_2(\text{SeO}_3)_2$  and (b)  $\text{Na}_2\text{Cu}(\text{SeO}_3)_2 \cdot 2\text{H}_2\text{O}$ .

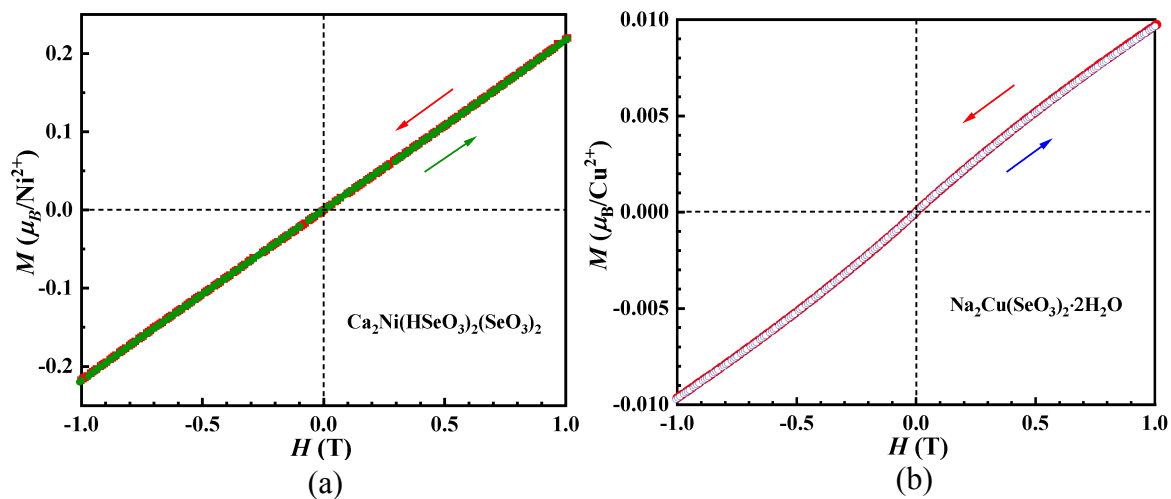

**Fig. S4.** The magnetization curves at low magnetic field for (a)  $\text{Ca}_2\text{Ni}(\text{HSeO}_3)_2(\text{SeO}_3)_2$  and (b)  $\text{Na}_2\text{Cu}(\text{SeO}_3)_2 \cdot 2\text{H}_2\text{O}$ .

**Table S1.** Fractional atomic coordinates ( $\times 10^4$ ) and equivalent isotropic displacement parameters ( $\times 10^3 \text{ \AA}^2$ ) for  $\text{Ca}_2\text{Ni}(\text{HSeO}_3)_2(\text{SeO}_3)_2$ .  $U_{\text{eq}}$  is defined as one third of the trace of the orthogonalised  $U_{ij}$  tensor.

| atom  | x          | y        | z        | $U_{\text{eq}}$ |
|-------|------------|----------|----------|-----------------|
| Se(1) | -706(1)    | 2386(1)  | 3192(1)  | 8(1)            |
| Se(2) | 7086(1)    | 1897(1)  | 7246(1)  | 10(1)           |
| Ni(1) | 5000       | 5000     | 5000     | 8(1)            |
| Ca(1) | 3829(1)    | 2718(1)  | 472(1)   | 9(1)            |
| O(1)  | 6350(4)    | 3716(3)  | 8885(3)  | 14(1)           |
| O(2)  | -2517(4)   | 4395(3)  | 3333(3)  | 10(1)           |
| O(3)  | 1953(4)    | 3298(3)  | 2763(3)  | 11(1)           |
| O(4)  | 5771(4)    | 2353(3)  | 5427(3)  | 14(1)           |
| O(5)  | 10545(4)   | 2704(4)  | 7739(3)  | 16(1)           |
| O(6)  | -2516(4)   | 782(3)   | 1167(3)  | 15(1)           |
| H(5)  | 10960(120) | 3660(90) | 7400(90) | 65(19)          |

**Table S2.** Selected bond lengths (Å) and bond angles (°) of Ca<sub>2</sub>Ni(HSeO<sub>3</sub>)<sub>2</sub>(SeO<sub>3</sub>)<sub>2</sub>.

| Bond                | Dist.      | Bond                 | Dist.      |
|---------------------|------------|----------------------|------------|
| Se(1)–O(2)          | 1.719(2)   | Ni(1)–O(3)#5         | 2.0758(19) |
| Se(1)–O(3)          | 1.6989(19) | Ni(1)–O(4)           | 2.051(2)   |
| Se(1)–O(6)          | 1.685(2)   | Ni(1)–O(4)#5         | 2.051(2)   |
| Se(2)–O(1)          | 1.665(2)   | Ca(1)–O(1)#6         | 2.361(2)   |
| Se(2)–O(4)          | 1.653(2)   | Ca(1)–O(1)#5         | 2.387(2)   |
| Se(2)–O(5)          | 1.793(2)   | Ca(1)–O(2)#4         | 2.527(2)   |
| Ni(1)–O(2)#3        | 2.109(2)   | Ca(1)–O(5)#9         | 2.493(2)   |
| Ni(1)–O(2)#4        | 2.109(2)   | Ca(1)–O(6)#4         | 2.463(2)   |
| Ni(1)–O(3)          | 2.0758(19) | Ca(1)–O(6)#10        | 2.341(2)   |
|                     |            | Ca(1)–O(3)           | 2.311(2)   |
| Angle               | (°)        | Angle                | (°)        |
| O(3)–Se(1)–O(2)     | 99.97(10)  | O(1)#8–Ca(1)–O(1)#5  | 73.19(8)   |
| O(6)–Se(1)–O(2)     | 97.58(10)  | O(1)#8–Ca(1)–O(2)#4  | 91.05(7)   |
| O(6)–Se(1)–O(3)     | 102.40(10) | O(1)#5–Ca(1)–O(2)#4  | 76.64(7)   |
| O(1)–Se(2)–O(5)     | 100.58(11) | O(1)#8–Ca(1)–O(5)#9  | 74.80(8)   |
| O(4)–Se(2)–O(1)     | 106.37(11) | O(1)#5–Ca(1)–O(5)#9  | 78.05(8)   |
| O(4)–Se(2)–O(5)     | 103.12(11) | O(1)#8–Ca(1)–O(6)#4  | 84.69(8)   |
| O(2)#3–Ni(1)–O(2)#4 | 180        | O(1)#5–Ca(1)–O(6)#4  | 132.26(8)  |
| O(3)–Ni(1)–O(2)#4   | 86.65(8)   | O(3)–Ca(1)–O(1)#5    | 83.10(8)   |
| O(3)#5–Ni(1)–O(2)#3 | 86.65(8)   | O(3)–Ca(1)–O(1)#8    | 153.91(8)  |
| O(3)#5–Ni(1)–O(2)#4 | 93.35(8)   | O(3)–Ca(1)–O(2)#4    | 72.65(7)   |
| O(3)–Ni(1)–O(2)#3   | 93.35(8)   | O(3)–Ca(1)–O(5)#9    | 111.24(7)  |
| O(3)–Ni(1)–O(3)#5   | 180.00(9)  | O(3)–Ca(1)–O(6)#4    | 104.15(8)  |
| O(4)–Ni(1)–O(2)#4   | 89.04(8)   | O(3)–Ca(1)–O(6)#10   | 102.80(8)  |
| O(4)#5–Ni(1)–O(2)#3 | 89.04(8)   | O(5)#9–Ca(1)–O(2)#4  | 153.69(8)  |
| O(4)#5–Ni(1)–O(2)#4 | 90.96(8)   | O(6)#10–Ca(1)–O(1)#5 | 155.45(8)  |
| O(4)–Ni(1)–O(2)#3   | 90.96(8)   | O(6)#10–Ca(1)–O(1)#8 | 103.29(8)  |
| O(4)–Ni(1)–O(3)#5   | 91.30(8)   | O(6)#10–Ca(1)–O(2)#4 | 127.91(7)  |
| O(4)–Ni(1)–O(3)     | 88.70(8)   | O(6)#4–Ca(1)–O(2)#4  | 61.74(7)   |
| O(4)#5–Ni(1)–O(3)#5 | 88.70(8)   | O(6)#4–Ca(1)–O(5)#9  | 136.24(8)  |
| O(4)#5–Ni(1)–O(3)   | 91.30(8)   | O(6)#10–Ca(1)–O(5)#9 | 77.62(8)   |
| O(4)#5–Ni(1)–O(4)   | 180        | O(6)#10–Ca(1)–O(6)#4 | 70.00(8)   |

Symmetry transformations used to generate equivalent atoms:

#3 -x, -y+1, -z+1    #4 x+1, y, z    #5 -x+1, -y+1, -z+1    #6 -x+1, -y+1, -z

#8 x, y, z-1    #9 x-1, y, z-1    #10 -x, -y, -z

**Table S3.** Fractional atomic coordinates ( $\times 10^4$ ) and equivalent isotropic displacement parameters ( $\times 10^3 \text{ \AA}^2$ ) for  $\text{Na}_2\text{Cu}(\text{SeO}_3)_2 \cdot 2\text{H}_2\text{O}$ .  $U_{\text{eq}}$  is defined as one third of the trace of the orthogonalised  $U_{ij}$  tensor.

| atom  | x        | y        | z        | $U_{\text{eq}}$ |
|-------|----------|----------|----------|-----------------|
| Se(1) | -537(1)  | 685(1)   | 2658(1)  | 13(1)           |
| Cu(1) | 5000     | 0        | 5000     | 13(1)           |
| Na(1) | 6799(2)  | 4873(2)  | 3329(1)  | 20(1)           |
| O(1)  | -1143(3) | 2584(3)  | 1400(2)  | 21(1)           |
| O(25) | -1508(2) | 1848(2)  | 4607(2)  | 15(1)           |
| O(3)  | 3061(2)  | 1966(2)  | 3747(2)  | 15(1)           |
| O(4)  | 3489(3)  | 6533(3)  | 1913(2)  | 24(1)           |
| H(4A) | 2830(70) | 7060(60) | 1020(50) | 40(8)           |
| H(4B) | 2080(80) | 5310(70) | 1810(50) | 50(10)          |

**Table S4.** Selected bond lengths ( $\text{\AA}$ ) and bond angles ( $^\circ$ ) of  $\text{Na}_2\text{Cu}(\text{SeO}_3)_2 \cdot 2\text{H}_2\text{O}$ .

| Bond                  | Dist.        | Bond                  | Dist.        |
|-----------------------|--------------|-----------------------|--------------|
| Se(1)-O(1)            | 1.6745(12)   | Na(1)-O(1)#5          | 2.3854(16)   |
| Se(1)-O(25)           | 1.7193(12)   | Na(1)-O(25)#5         | 2.4748(13)   |
| Se(1)-O(3)            | 1.7071(11)   | Na(1)-O(25)#2         | 2.5046(15)   |
| Cu(1)-O(25)#5         | 1.9873(11)   | Na(1)-O(3)            | 2.3717(14)   |
| Cu(1)-O(25)#6         | 1.9873(11)   | Na(1)-O(3)#2          | 2.4930(15)   |
| Cu(1)-O(3)#3          | 1.9799(11)   | Na(1)-O(4)            | 2.3495(15)   |
| Cu(1)-O(3)            | 1.9800(11)   |                       |              |
| Angle                 | ( $^\circ$ ) | Angle                 | ( $^\circ$ ) |
| O(1)-Se(1)-O(25)      | 100.00(6)    | O(25)#5-Na(1)-O(25)#2 | 88.43(5)     |
| O(1)-Se(1)-O(3)       | 100.95(6)    | O(25)#5-Na(1)-O(3)#2  | 104.48(5)    |
| O(3)-Se(1)-O(25)      | 98.77(6)     | O(3)-Na(1)-O(1)#5     | 107.65(5)    |
| O(25)#6-Cu(1)-O(25)#5 | 180          | O(3)-Na(1)-O(25)#2    | 138.00(5)    |
| O(3)-Cu(1)-O(25)#6    | 92.11(5)     | O(3)#2-Na(1)-O(25)#2  | 62.72(4)     |
| O(3)-Cu(1)-O(25)#5    | 87.89(5)     | O(3)-Na(1)-O(25)#5    | 69.19(4)     |
| O(3)#3-Cu(1)-O(25)#5  | 92.11(5)     | O(3)-Na(1)-O(3)#2     | 88.23(5)     |
| O(3)#3-Cu(1)-O(25)#6  | 87.89(5)     | O(4)-Na(1)-O(1)#5     | 120.60(6)    |
| O(3)#3-Cu(1)-O(3)     | 180          | O(4)-Na(1)-O(25)#2    | 112.48(6)    |
| O(1)#5-Na(1)-O(25)#2  | 92.68(5)     | O(4)-Na(1)-O(25)#5    | 157.21(6)    |
| O(1)#5-Na(1)-O(25)#5  | 64.65(4)     | O(4)-Na(1)-O(3)       | 88.59(5)     |
| O(1)#5-Na(1)-O(3)#2   | 154.16(5)    | O(4)-Na(1)-O(3)#2     | 78.96(5)     |

Symmetry transformations used to generate equivalent atoms:

#2 -x+1,-y+1,-z+1    #3 -x+1,-y,-z+1    #5 x+1,y,z    #6 -x,-y,-z+1
